# Supplementary material for: First-principles exploration of the versatile configurations at an alkynyl-protected coinage metal(111) interface
Source: Royal Society of Chemistry journal article supplement (doi:10.1039/d0nr07387c), 2020-12-09
Supplement: d0nr07387c1.pdf [file d0nr07387c1.pdf]

## Supporting Information

# **A First Principles Exploration on the Versatile Configurations at Alkynyl-protected Coinage Metal(111) Interface**

Fang Sun and Qing Tang\*

School of Chemistry and Chemical Engineering, Chongqing Key Laboratory of Theoretical and Computational Chemistry, Chongqing University, Chongqing 401331, China

\*To whom correspondence should be addressed. E-mail: [qingtang@cqu.edu.cn](mailto:qingtang@cqu.edu.cn).

Table S1. Binding energies (BE: eV) and the optimized structures (only the topmost surface layer is shown) of methylethynyl ( $\text{CH}_3\text{-C}\equiv\text{C-}$ ) at different adsorption sites on Au (111) with 4 layers of slab in a  $4 \times 4$  lateral cell. The initial angle between the 111 plane and linear methylethynyl is  $90^\circ$ .

| Sites  | The optimized structures                                                            | BE (eV)      |
|--------|-------------------------------------------------------------------------------------|--------------|
| top    | 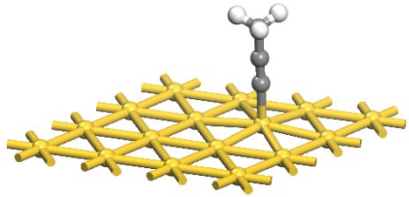   | -3.06        |
| bridge |   | -3.34        |
| hcp    |  | -3.40        |
| fcc    |  | <u>-3.45</u> |

Table S2. Binding energies (BE: eV) and the optimized structures (only the topmost surface layer is shown) of methylethynyl ( $\text{CH}_3\text{-C}\equiv\text{C-}$ ) at different adsorption sites on Ag (111) with 4 layers of slab in a  $4 \times 4$  lateral cell. The initial angle between the 111 plane and linear methylethynyl is  $90^\circ$ .

| Sites  | The optimized structures                                                             | BE (eV)      |
|--------|--------------------------------------------------------------------------------------|--------------|
| top    | Relaxed to hcp                                                                       | /            |
| bridge | Relaxed to fcc                                                                       | /            |
| hcp    | 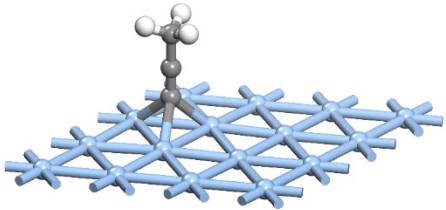    | -3.54        |
| fcc    |  | <u>-3.55</u> |

Table S3. Binding energies (BE: eV) and the optimized structures (only the topmost surface layer is shown) of methylethynyl ( $\text{CH}_3\text{-C}\equiv\text{C-}$ ) at different adsorption sites on Cu (111) with 4 layers of slab in a  $4 \times 4$  lateral cell. The initial angle between the 111 plane and linear methylethynyl is  $90^\circ$ .

| Sites  | The optimized structures                                                             | BE (eV)      |
|--------|--------------------------------------------------------------------------------------|--------------|
| top    | Relaxed to hcp                                                                       | /            |
| bridge | Relaxed to fcc                                                                       | /            |
| hcp    | 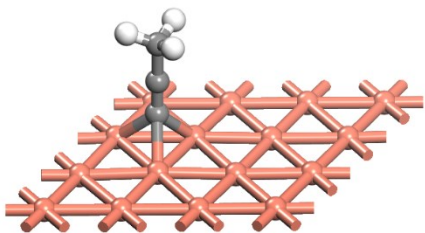   | -4.23        |
| fcc    |  | <u>-4.24</u> |

Table S4. The orientation, the optimized geometry structures and binding energies (per ligand) for  $\text{CH}_3\text{C}\equiv\text{C}-\text{Au}_{\text{adatom}}-\text{C}\equiv\text{CCH}_3$  staple motif at the bridge sites on Au(111). Only the topmost surface layer is shown. Color legend:  $\text{Au}_{\text{adatom}}$ , red; other Au, yellow; C, grey; H, white.

| The orientation | The optimized structures | BE (eV)      |
|-----------------|--------------------------|--------------|
|                 |                          | -3.04        |
|                 |                          | -3.32        |
|                 |                          | -3.28        |
|                 |                          | -3.09        |
|                 |                          | -3.32        |
|                 |                          | <u>-3.44</u> |

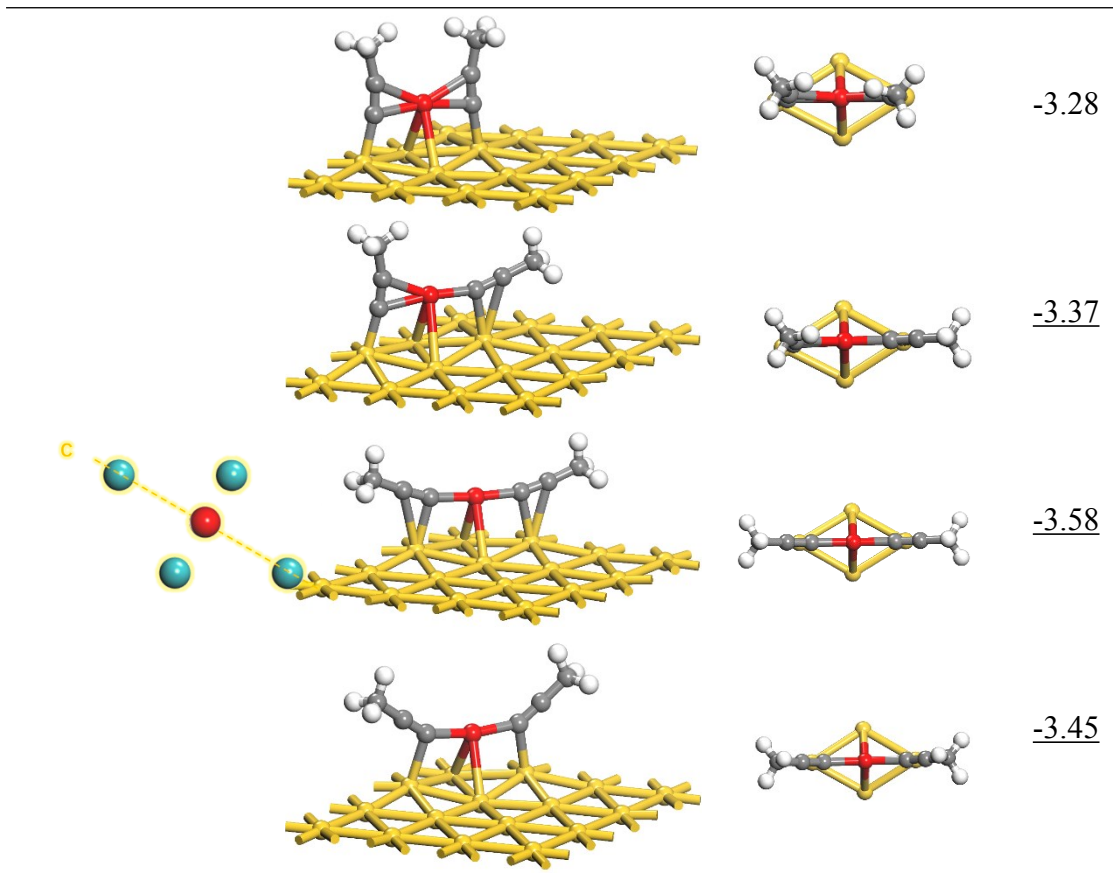

Table S5. The orientation, the optimized geometry structures and binding energies (per ligand) for  $\text{CH}_3\text{C}\equiv\text{C}-\text{Ag}_{\text{adatom}}-\text{C}\equiv\text{CCH}_3$  staple motif at the bridge sites on Ag(111). Only the topmost surface layer is shown. Color legend:  $\text{Ag}_{\text{adatom}}$ , purple; other Ag, baby blue; C, grey; H, white.

| The orientation                                                                     | The optimized structures                                                             | BE (eV)      |
|-------------------------------------------------------------------------------------|--------------------------------------------------------------------------------------|--------------|
| 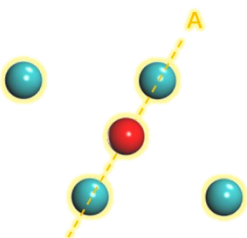  |     | -3.16        |
|                                                                                     |    | -3.31        |
|                                                                                     |  | -3.35        |
|  |  | -3.22        |
|                                                                                     |  | -3.41        |
|                                                                                     |  | <u>-3.47</u> |

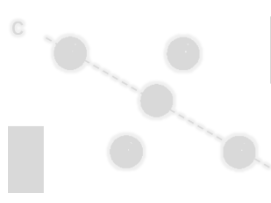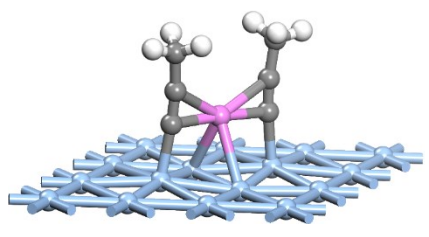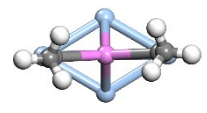

-3.23

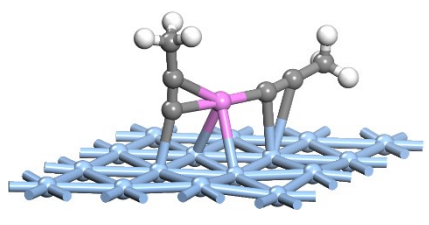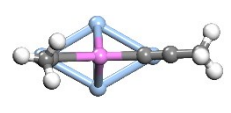

-3.44

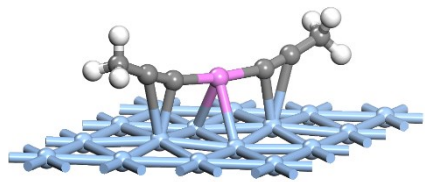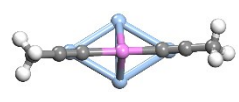

-3.48

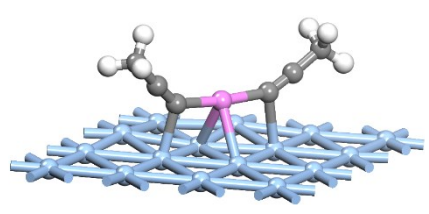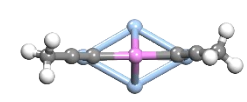

-3.46



Table S6. The orientation, the optimized geometry structures and binding energies (per ligand) for  $\text{CH}_3\text{C}\equiv\text{C}-\text{Cu}_{\text{adatom}}-\text{C}\equiv\text{CCH}_3$  staple motif at the bridge sites on  $\text{Cu}(111)$ . Only the topmost surface layer is shown. Color legend:  $\text{Cu}_{\text{adatom}}$ , green; other Cu, brick-red; C, grey; H, white.

| The orientation                                                                     | The optimized structures                                                                                                                                                   | BE (eV)      |
|-------------------------------------------------------------------------------------|----------------------------------------------------------------------------------------------------------------------------------------------------------------------------|--------------|
|                                                                                     | 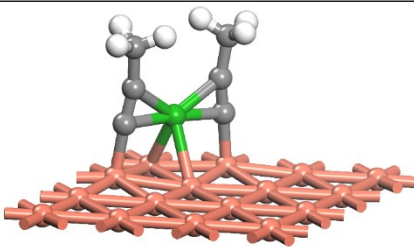      | -3.89        |
|    |       | -3.96        |
|                                                                                     |   | -3.96        |
|                                                                                     |   | <u>-4.14</u> |
|  |   | <u>-4.13</u> |
|                                                                                     |   | <u>-4.12</u> |

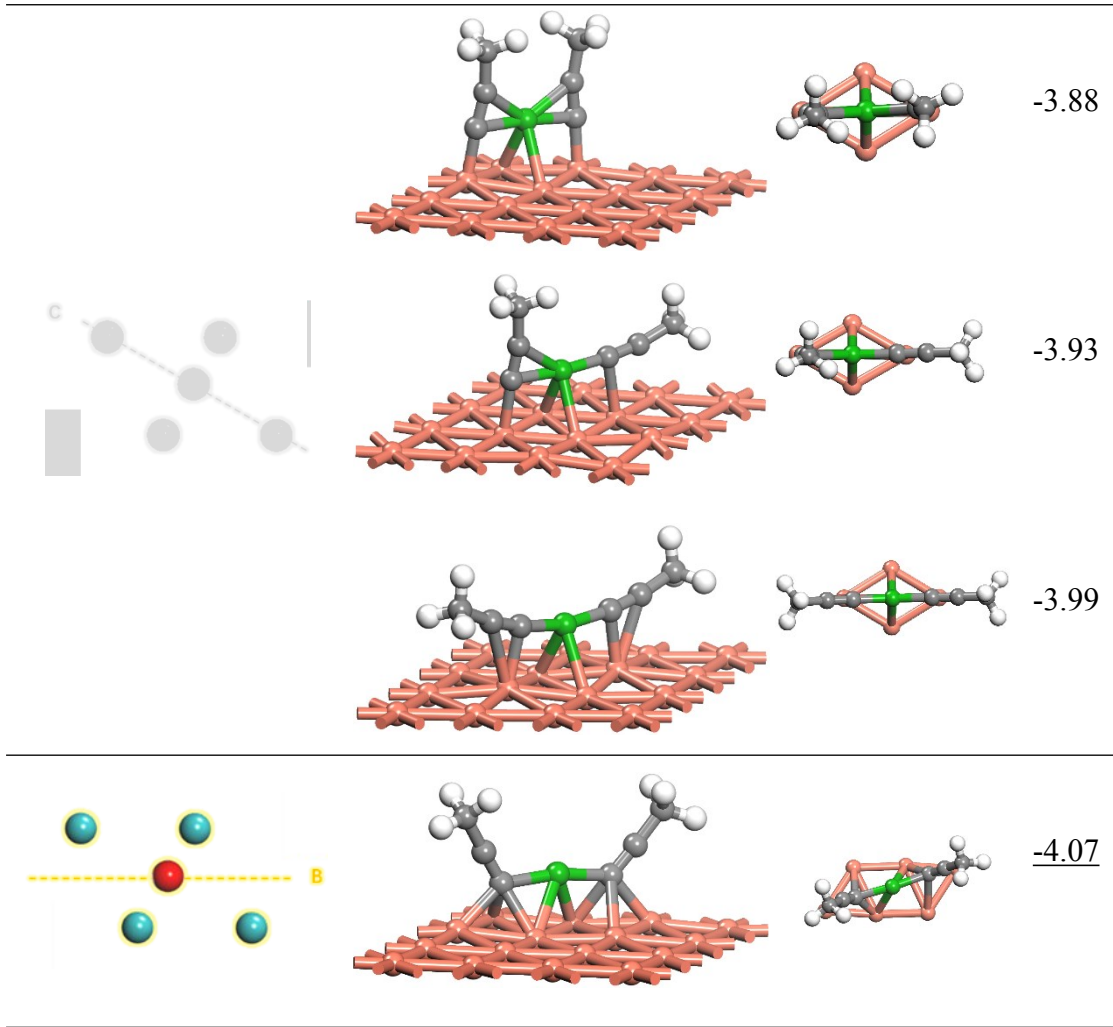

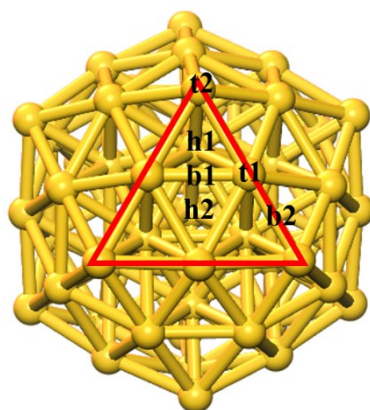

Figure S1. Schematic presentation of adsorption sites of high-symmetry on a triangular face of the Au<sub>55</sub> nanocluster.

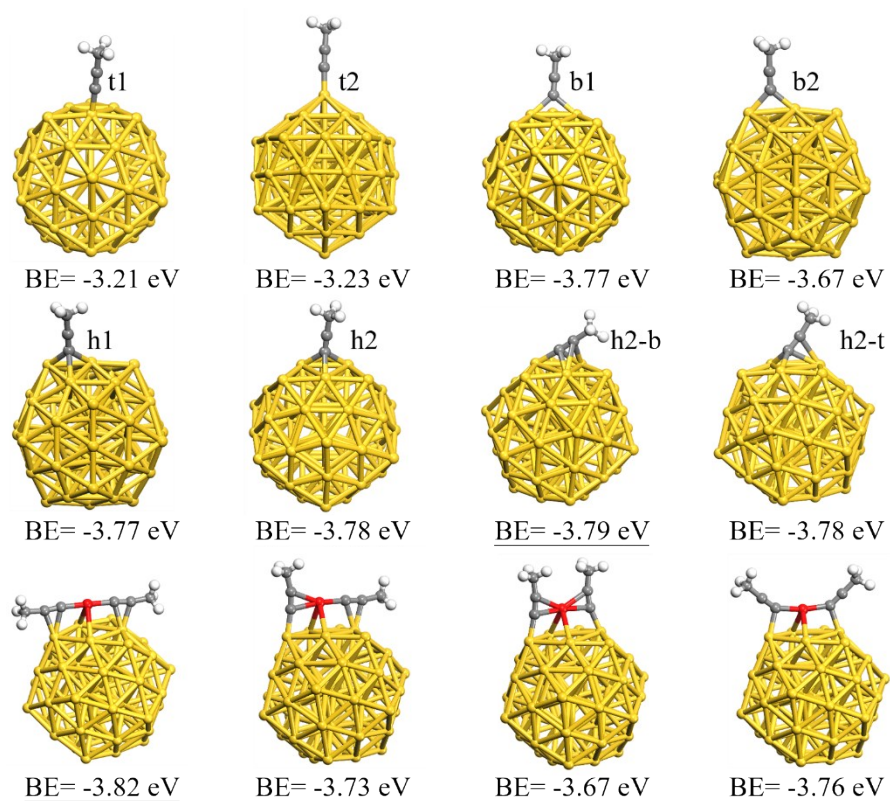

Figure S2. The binding energies and optimized structures of  $\text{CH}_3\text{C}\equiv\text{C}$  covalently bonded to icosahedral  $\text{Au}_{55}$  cluster. Color legend:  $\text{Au}_{\text{adatom}}$ , red; other Au, yellow; C, grey; H, white.

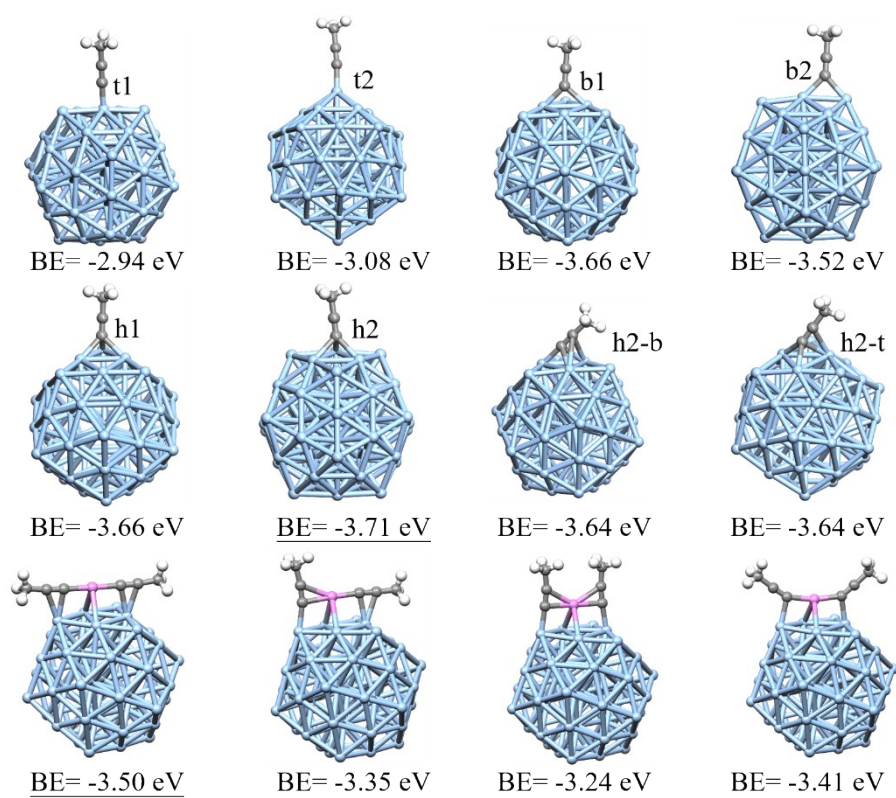

Figure S3. The binding energies and optimized structures of  $\text{CH}_3\text{C}\equiv\text{C}$  covalently bonded to icosahedral  $\text{Ag}_{55}$  cluster. Color legend:  $\text{Ag}_{\text{adatom}}$ , purple; other Ag, baby blue; C, grey; H, white.

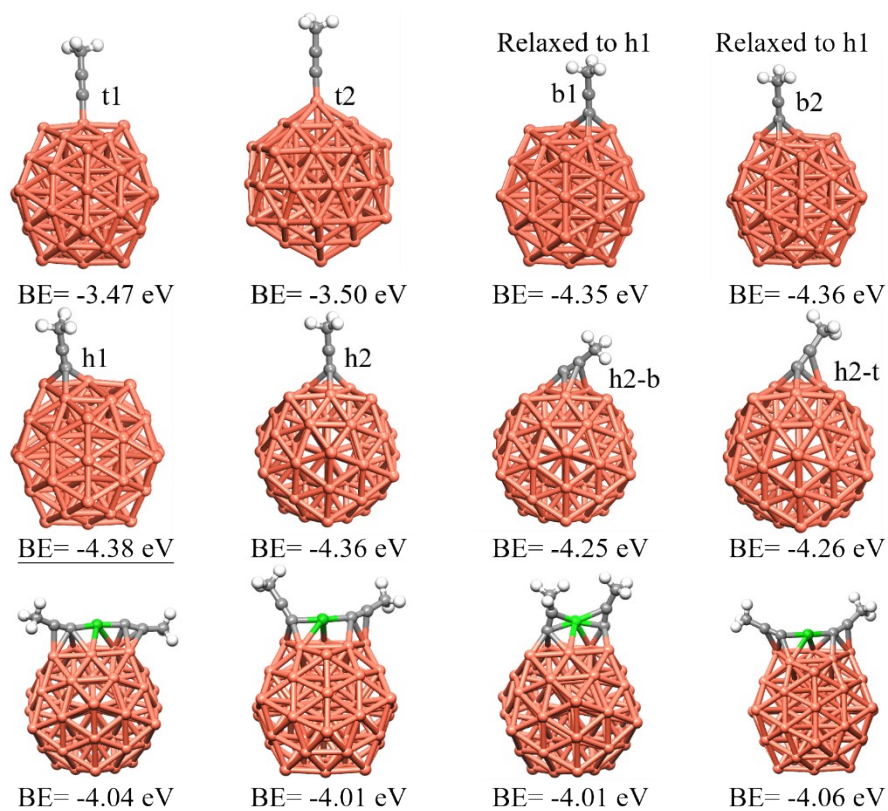

Figure S4. The binding energies and optimized structures of  $\text{CH}_3\text{C}\equiv\text{C}$  covalently bonded to icosahedral  $\text{Cu}_{55}$  cluster. Color legend:  $\text{Cu}_{\text{adatom}}$ , green; other Cu, brick-red; C, grey; H, white.

Table S7. Comparison of binding energies per  $\text{CH}_3\text{C}\equiv\text{C}$ - for the most stable mode of the bridge and staple motifs on the three coinage metal(111) surfaces with and without including the D3 approximation.

| The most stable Mode |              | Category | PBE-D3 level | PBE (without vdW correction) |
|----------------------|--------------|----------|--------------|------------------------------|
| Au(111)              | Bridge motif |          | -3.54 eV     | -3.17 eV                     |
|                      | Staple motif |          | -3.58 eV     | -2.87 eV                     |
| Ag(111)              | Bridge motif |          | -3.55 eV     | -3.29 eV                     |
|                      | Staple motif |          | -3.48 eV     | -2.90 eV                     |
| Cu(111)              | Bridge motif |          | -4.26 eV     | -3.86 eV                     |

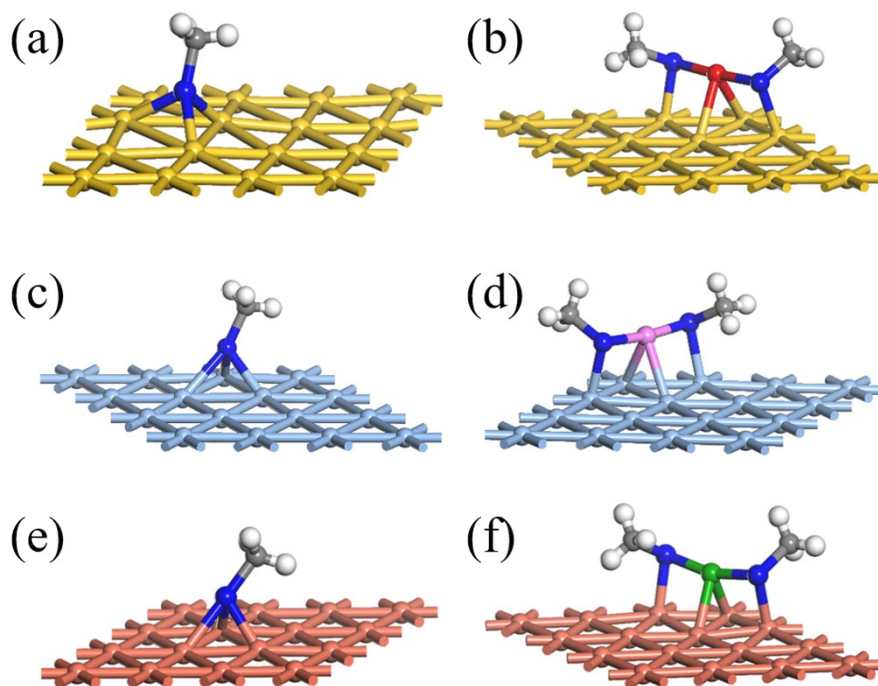

Figure S5. The optimized structures (only the topmost surface layer is shown) of methylthiolate ( $\text{CH}_3\text{S}^-$ ) for the bridging and staple motifs on (a-b) Au(111), (c-d) Ag(111), and (e-f) Cu(111) with 4 layers of slab in a  $4 \times 4$  lateral cell. The initial angle between the surface normal and S-C bond is  $30^\circ$ . S atom is highlighted in blue.
